# Supplementary material
Source: publisher figshare collection journal article supplement (https://acs.figshare.com/ndownloader/files/10209933)
Supplement: Supplementary file 1 [file 10209933]

## Supporting Information

### Shape-Control of Pt-Ru Nanocrystals: Tuning Surface Structure for Enhanced Electrocatalytic Methanol Oxidation

Liang Huang,<sup>†,§</sup> Xueping Zhang,<sup>†,‡</sup> Qingqing Wang,<sup>†</sup> Yujie Han,<sup>†</sup> Youxing Fang,<sup>†</sup> and Shaojun Dong<sup>\*†,‡</sup>

<sup>†</sup>State Key Laboratory of Electroanalytical Chemistry, Changchun Institute of Applied Chemistry, Chinese Academy of Science, Changchun, Jilin 130022, PR China

<sup>§</sup>University of Science and Technology of China, Hefei, Anhui 230026 (P. R. China)

<sup>‡</sup>University of Chinese Academy of Sciences, Beijing, 100049, PR China

\*Corresponding author: dongsj@ciac.ac.cn

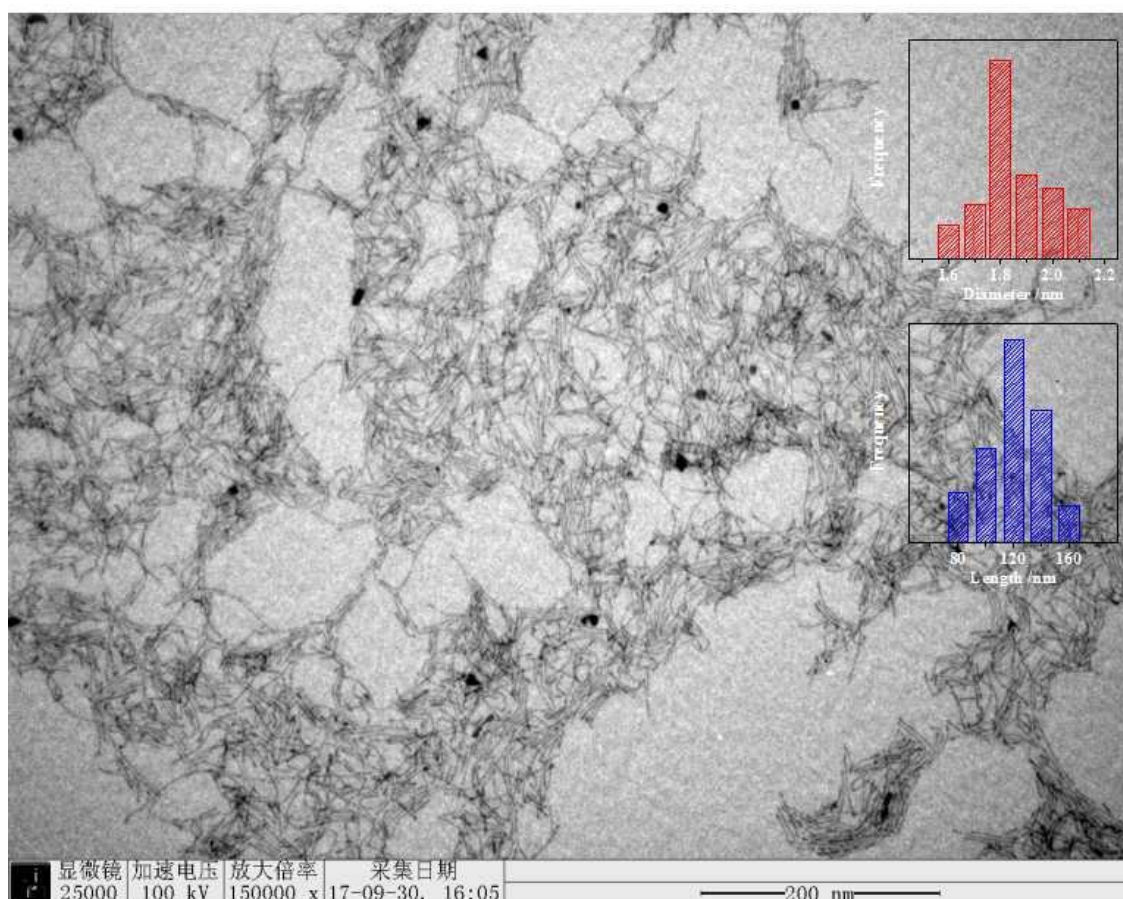

**Figure S1.** Large-area TEM image of the as-prepared PtRu NWs. The inset shows the histograms of diameter and length of the PtRu NWs.

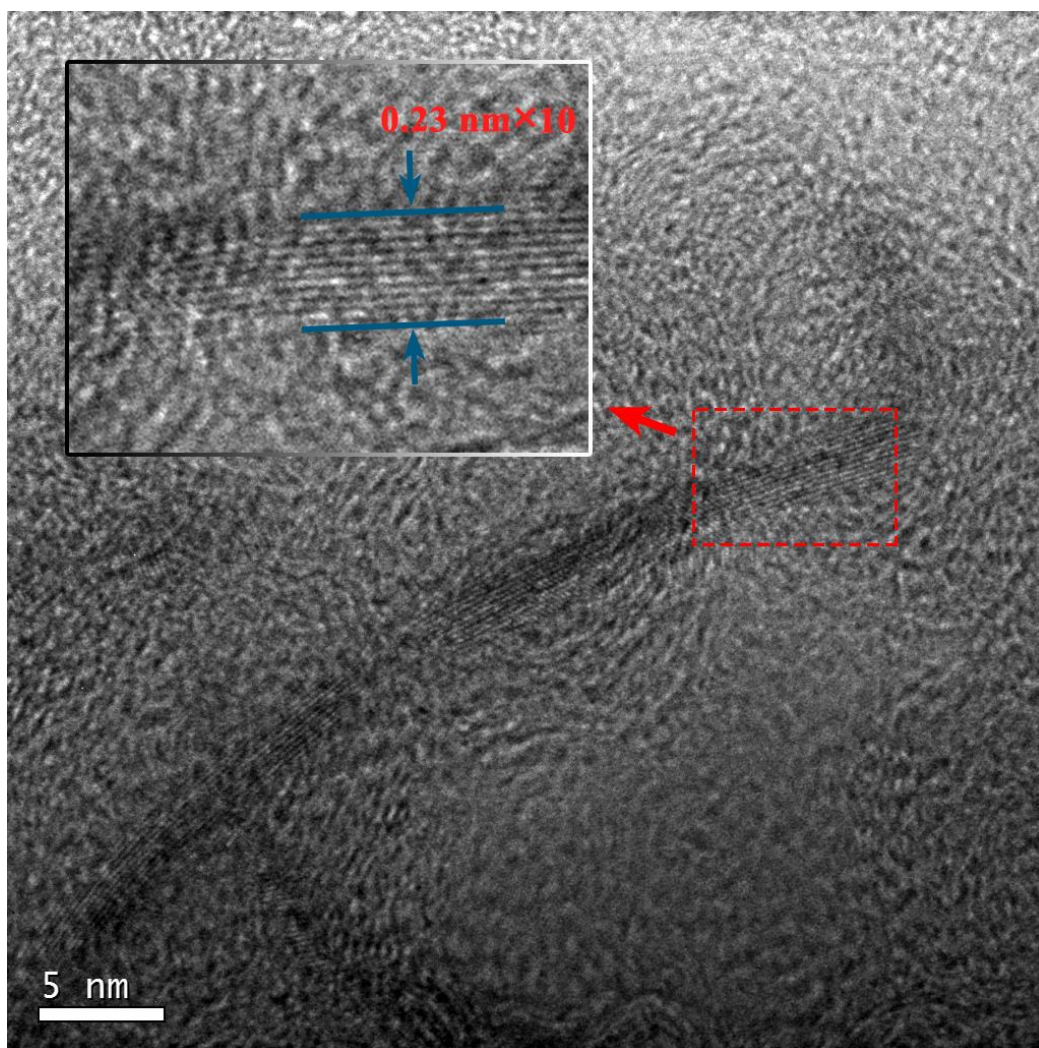

**Figure S2.** HRTEM image of an individual PtRu NW. The inset is magnified HRTEM image of the selected area.

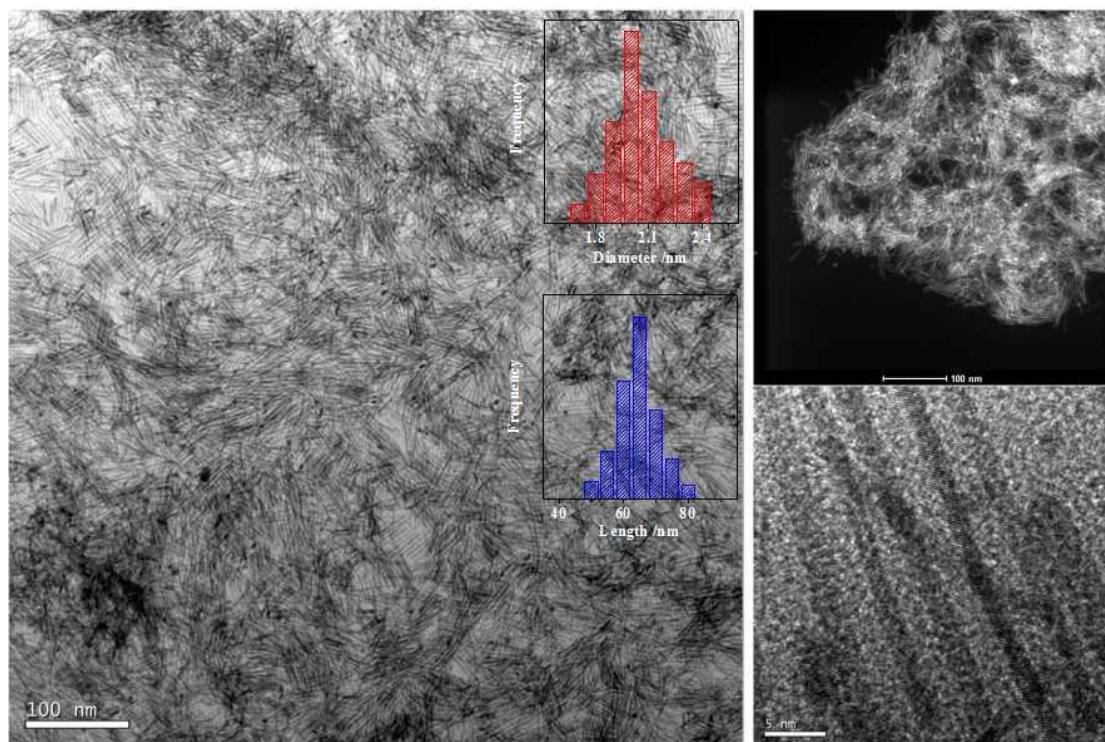

**Figure S3.** Large-area TEM image, HAADF-STEM image and HRTEM image of the as-prepared PtRu NRs<sub>1</sub>. The inset shows the histograms of diameter and length of the PtRuNRs<sub>1</sub>.



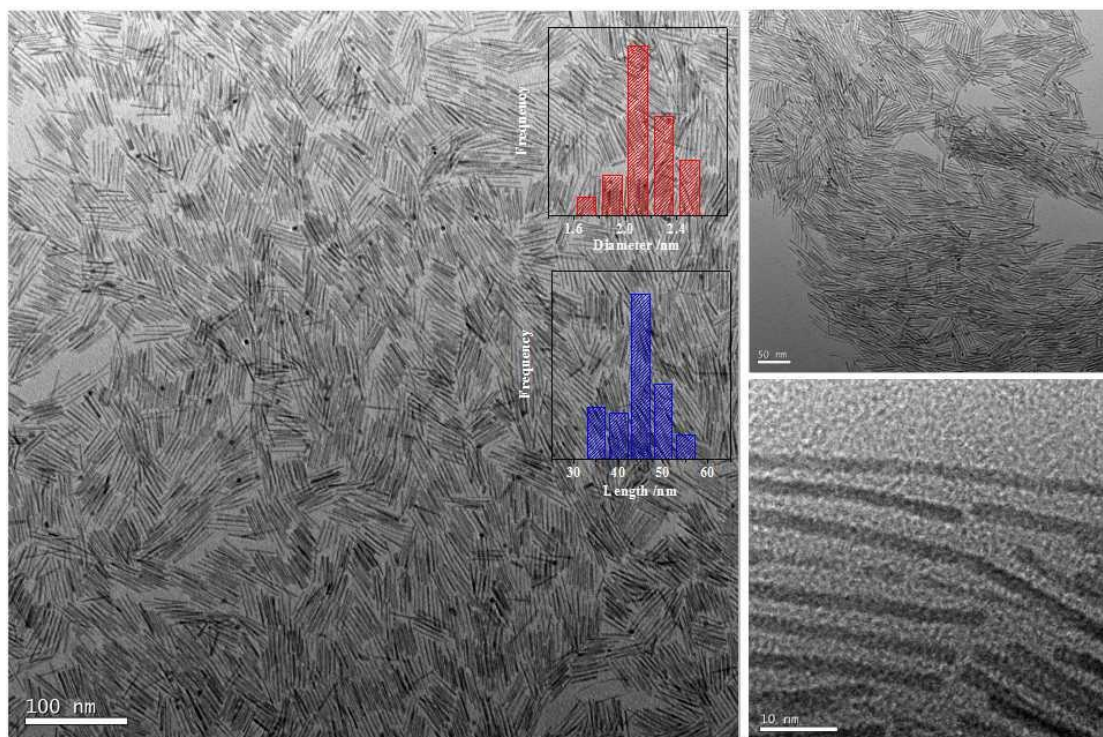

**Figure S4.** Large-area TEM image and HRTEM image of the as-prepared PtRu NRs<sub>2</sub>. The inset shows the histograms of diameter and length of the PtRuNRs<sub>2</sub>.

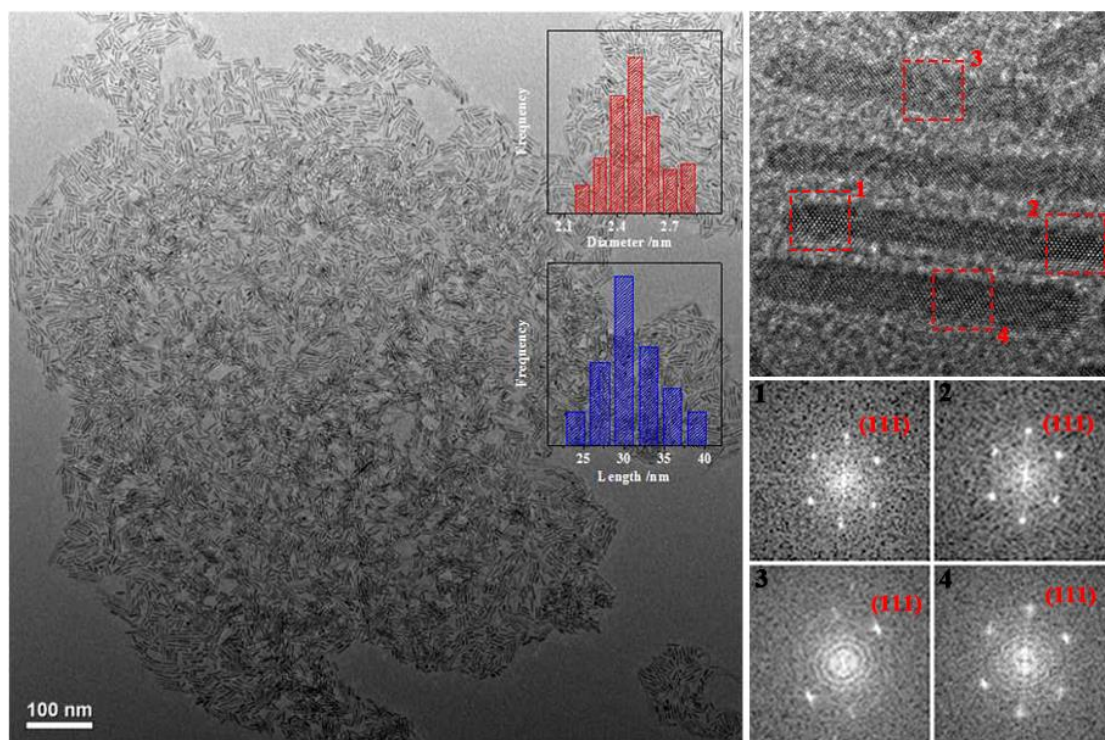

**Figure S5.** Large-area TEM image, HRTEM image and the corresponding FFT patterns of the as-prepared PtRu NRs<sub>3</sub>. The inset in left shows the histograms of diameter and length of the PtRuNRs<sub>3</sub>.

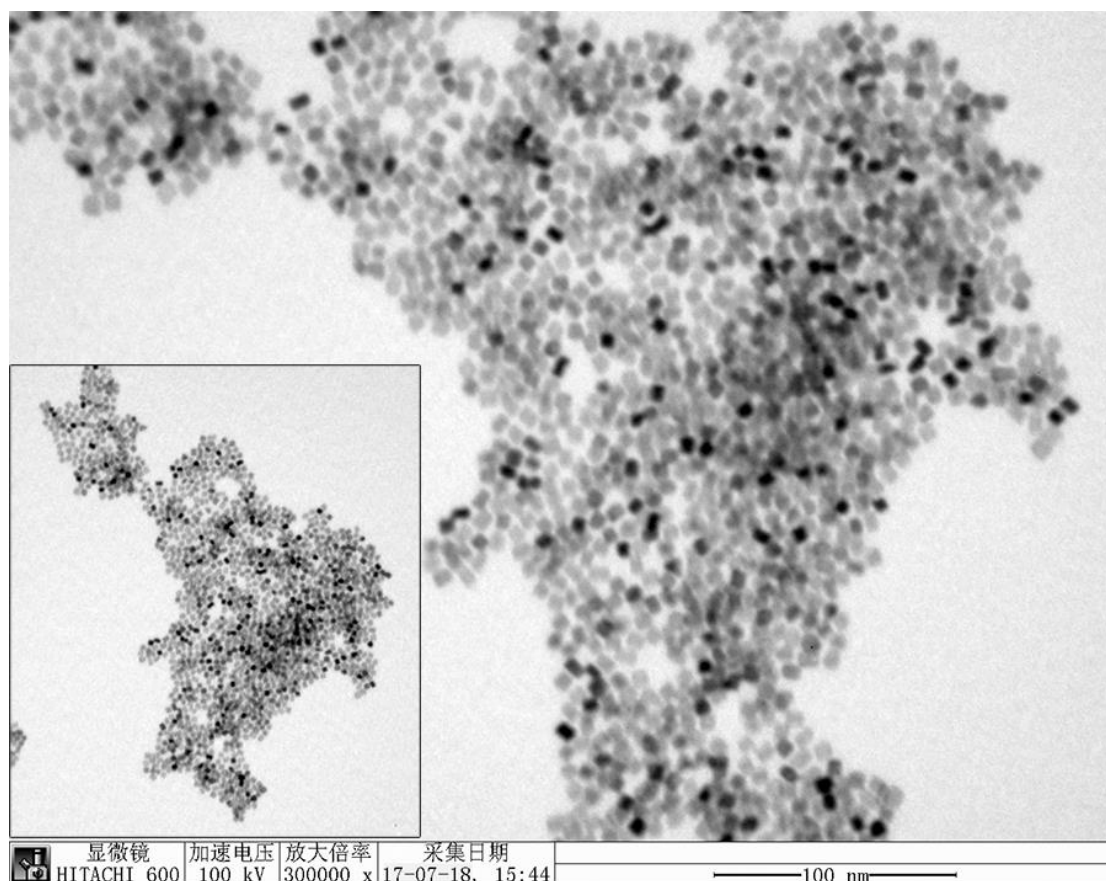

**Figure S6.** Large-area TEM images of the as-prepared PtRu NCs.

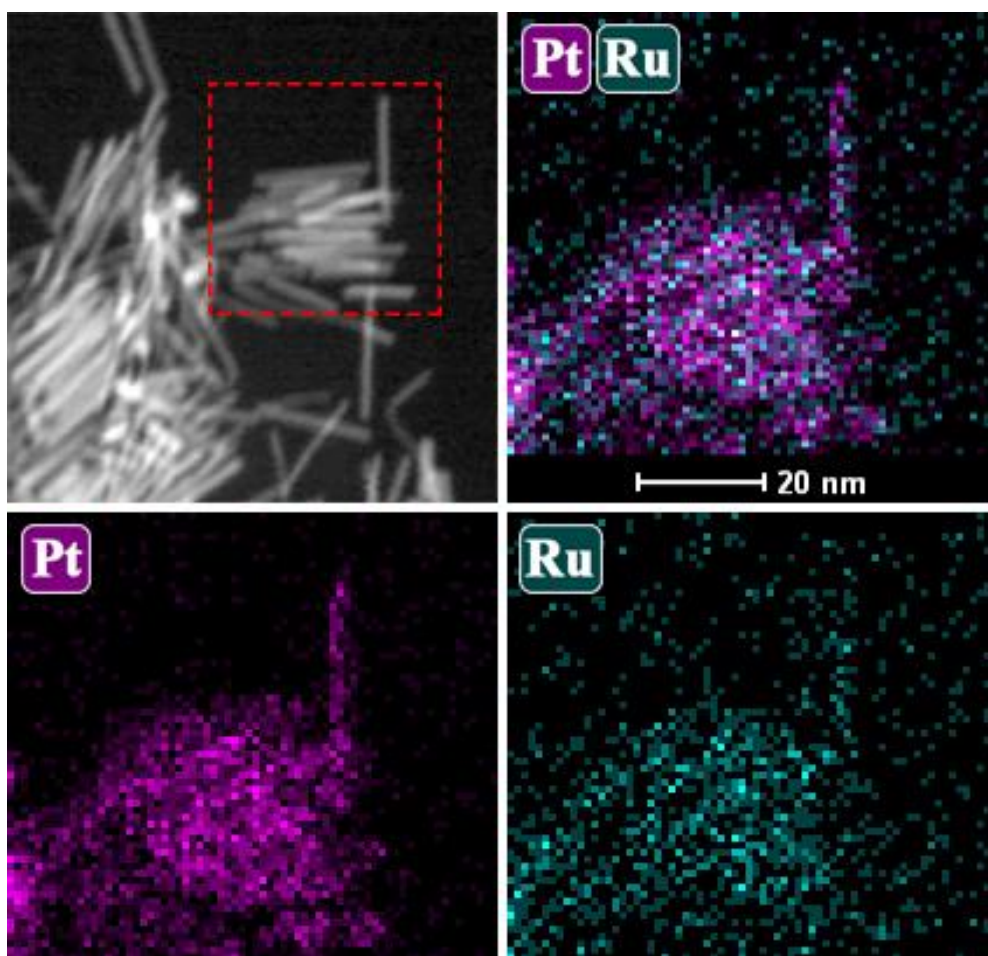

**Figure S7.** HADDF-STEM image and the corresponding elemental mapping images of the PtRu NRs.



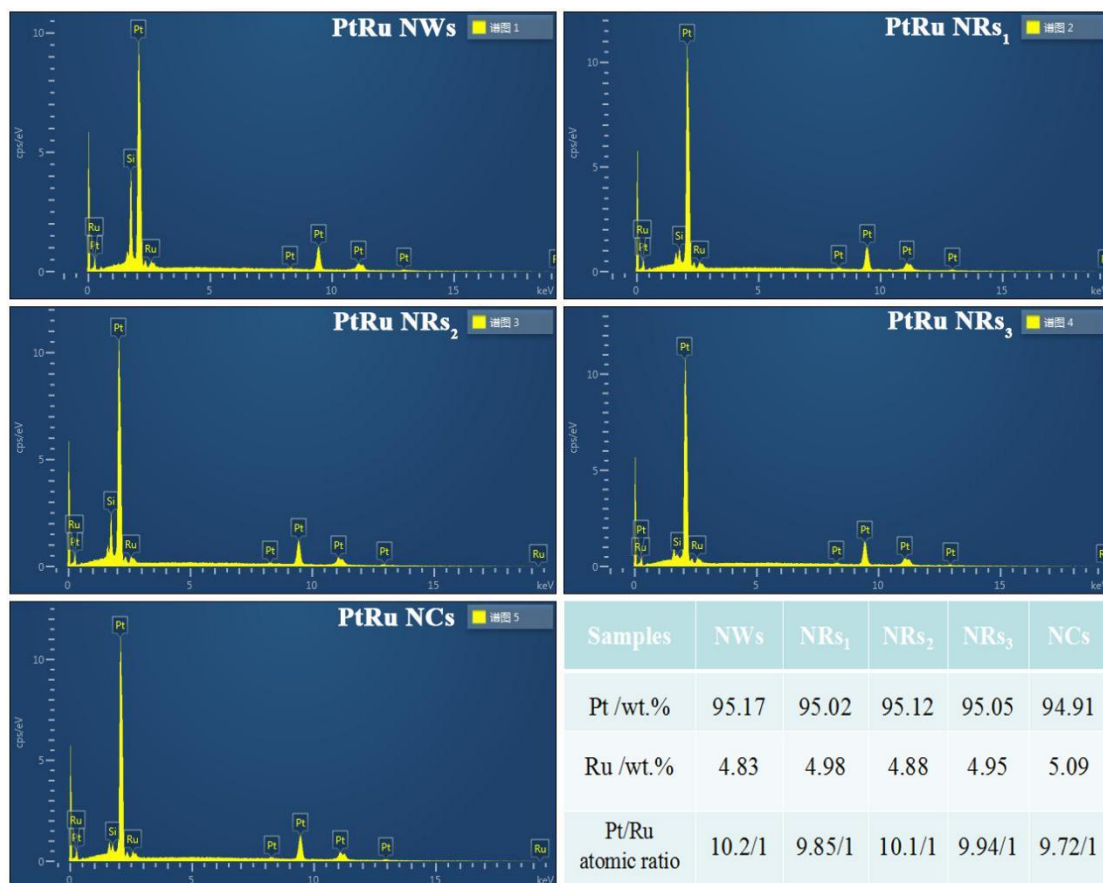

**Figure S8.** SEM-EDS spectra and the corresponding ICP-AES results of Pt/Ru atomic ratio of the as-prepared PtRu nanocrystals.

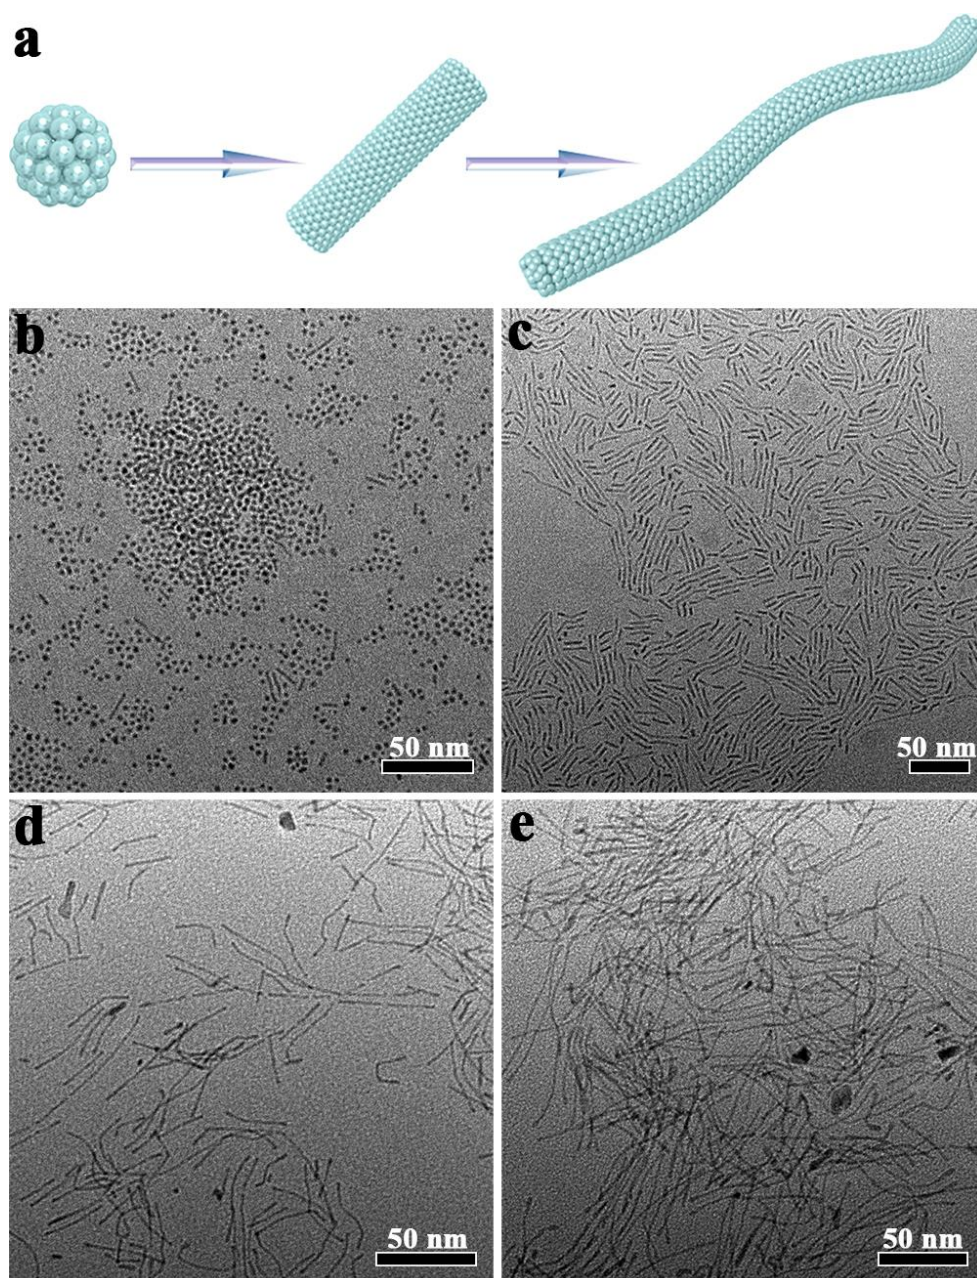

**Figure S9.** (a) Schematic illustration of the growth mechanism of PtRu NWs, and TEM images of the PtRu NWs collected at (b) 30 min, (c) 1 h, (d) 2 h and (e) 3 h of the reaction times, respectively.

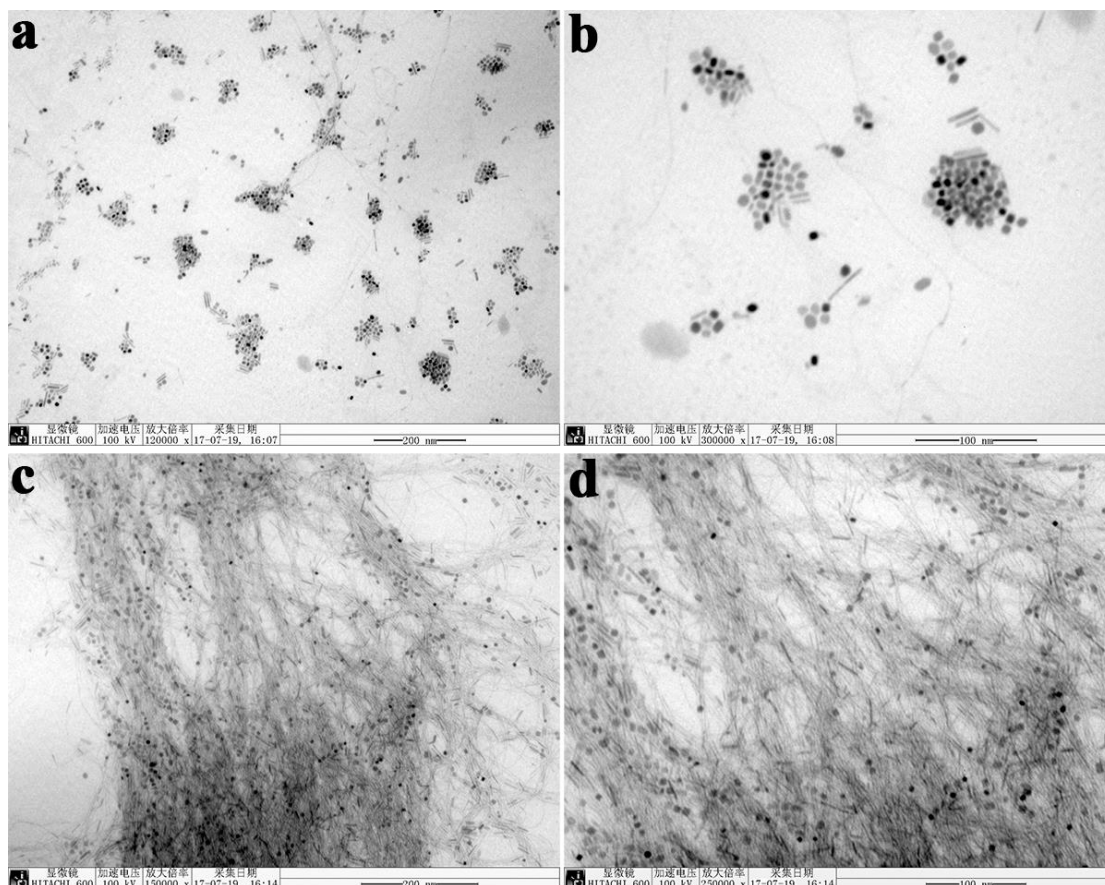

**Figure S10.** TEM images of the products with the same reaction conditions as PtRu NWs except the use of (a,b) 0 mg and (c,d) 180 mg DDAC.

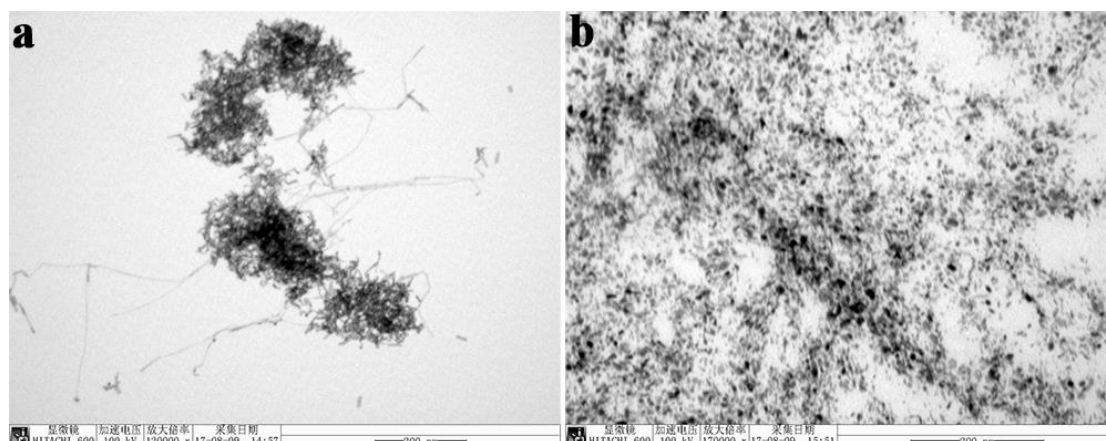

**Figure S11.** TEM images of the products with the same reaction conditions as PtRu NWs except the use of (a) 5 mg  $\text{W}(\text{CO})_6$ , and (b) the absence of  $\text{W}(\text{CO})_6$  and DDAC.

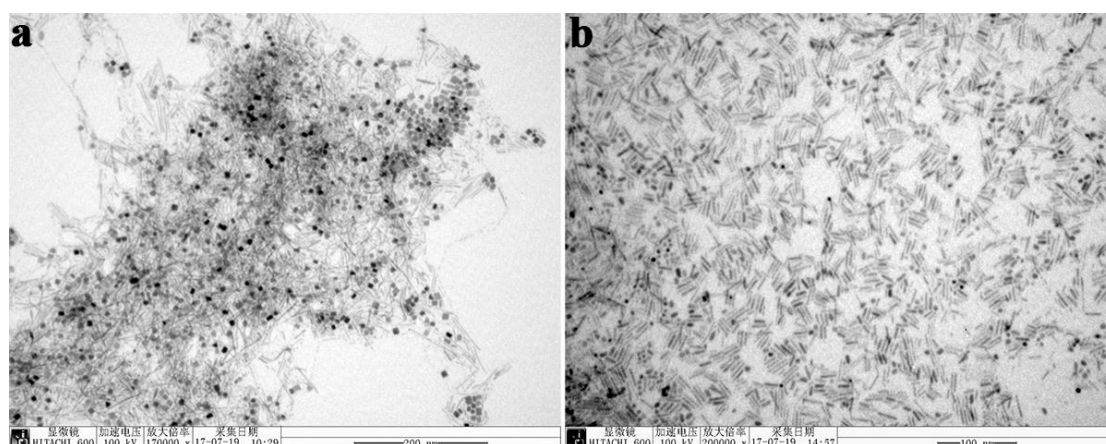

**Figure S12.** TEM images of the products with the same reaction conditions as PtRu NRs except the use of (a) 20 mg HDBAC, and (b) the absence of  $\text{Ru}(\text{acac})_3$ .



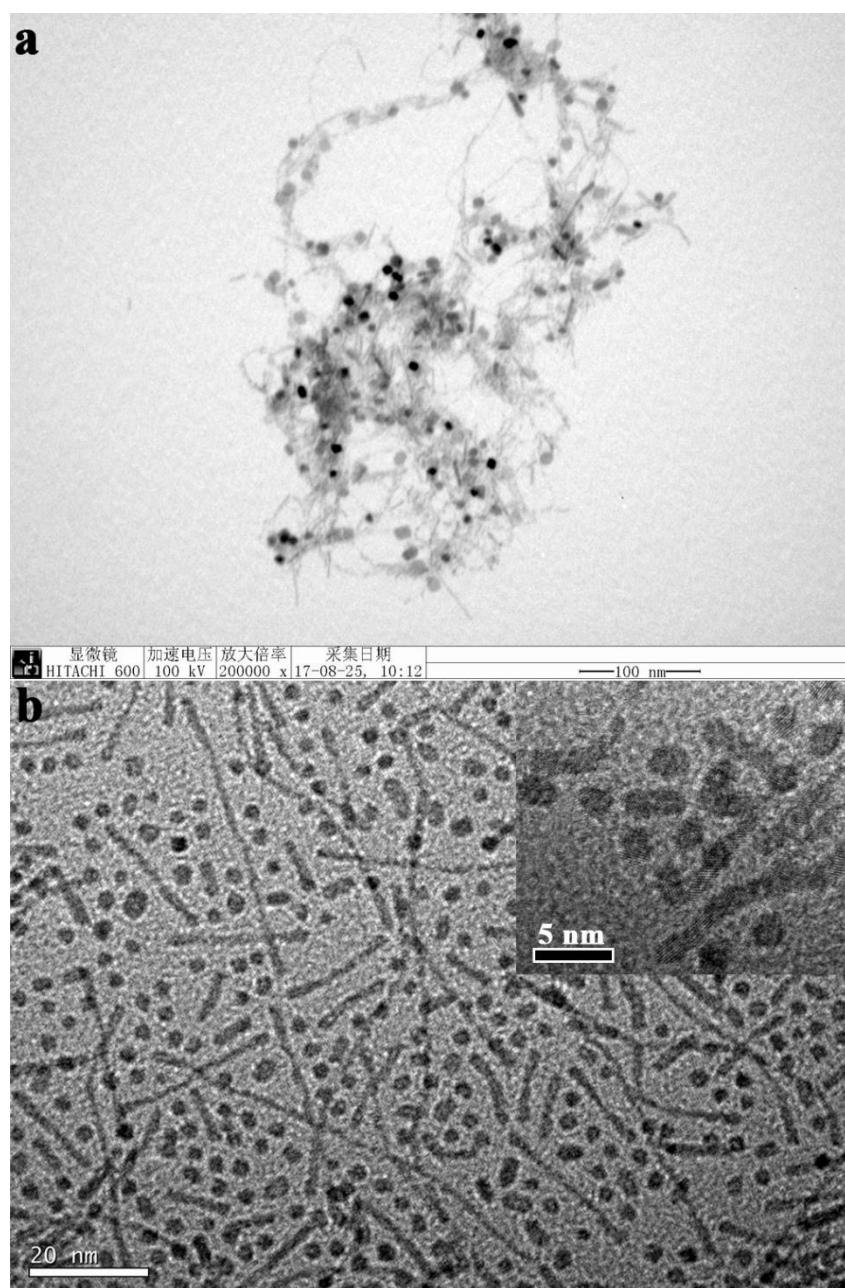

**Figure S13.** TEM images of the products with the same reaction conditions as PtRu NWs except changing the reaction temperature to (a) 170°C and (b) 195°C. The inset in (b) is the HRTEM image.

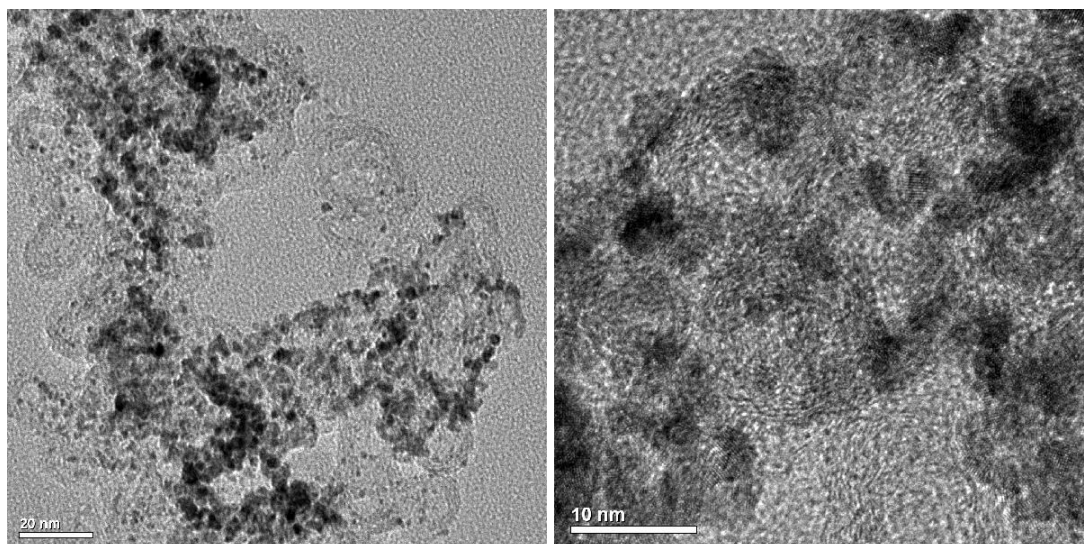

**Figure S14.** TEM images of commercial PtRu/C catalysts.

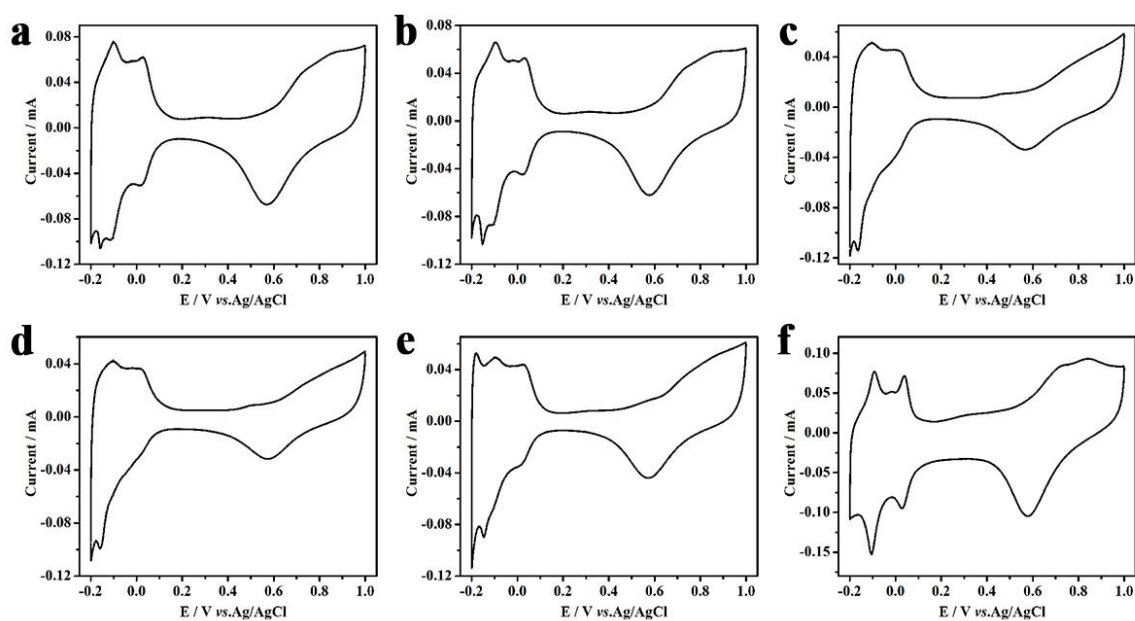

**Figure S15.** CVs of these catalysts recorded at room temperature in 0.1 M  $\text{HClO}_4$  solution at a sweep rate of  $50 \text{ mV s}^{-1}$ , (a) PtRu NWs, (b) PtRu NRs<sub>1</sub>, (c) PtRu NRs<sub>2</sub>, (d) PtRu NRs<sub>3</sub>, (e) PtRu NCs and (f) commercial Pt/C.

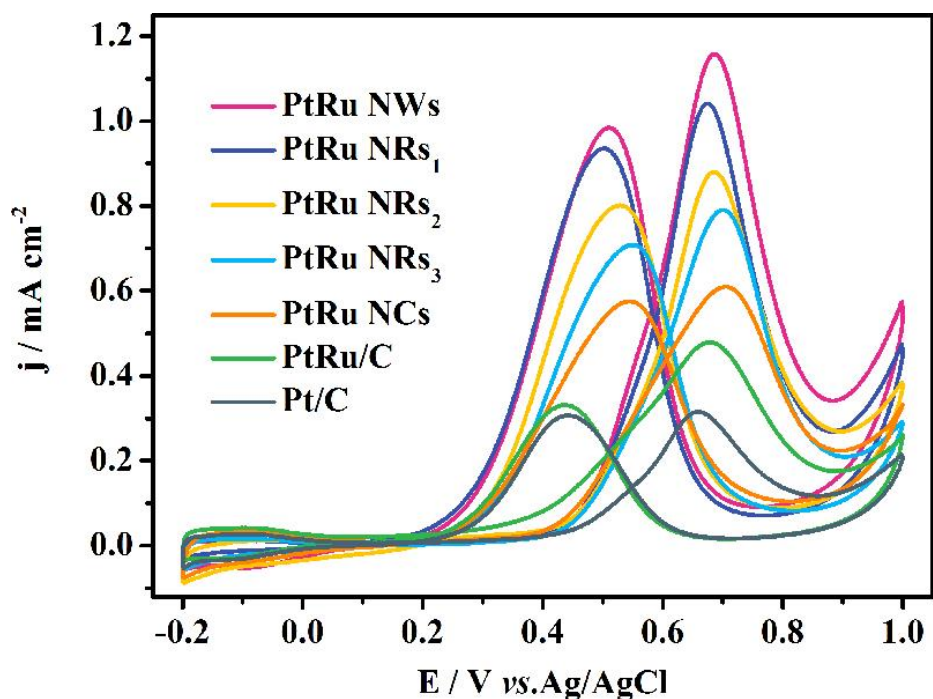

**Figure S16.** Specific activities of these catalysts by normalizing the MOR current densities with ECSA.

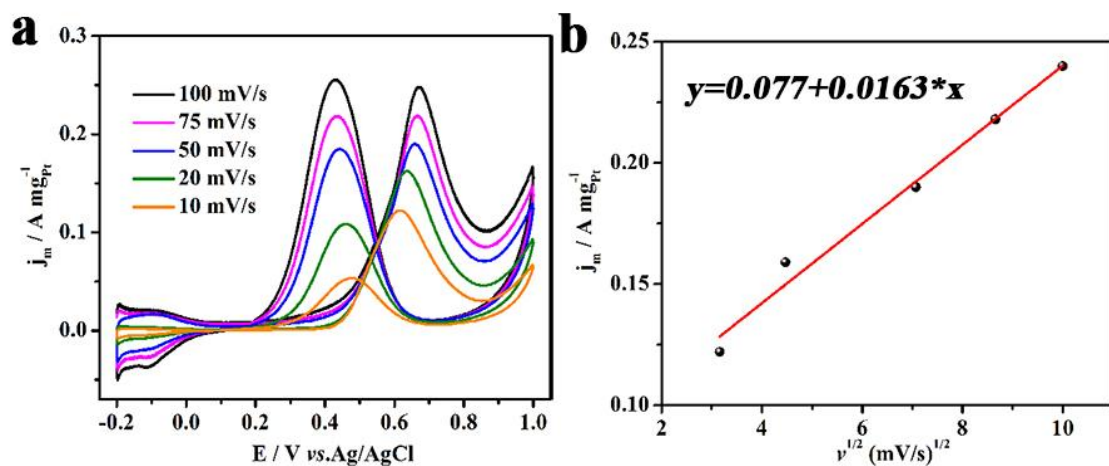

**Figure S17.** (a) CVs of MOR on commercial Pt/C at different scan rates and (b) the corresponding plot of forward peak current ( $j_m$ ) versus the square root of the scan rate ( $v^{1/2}$ ).

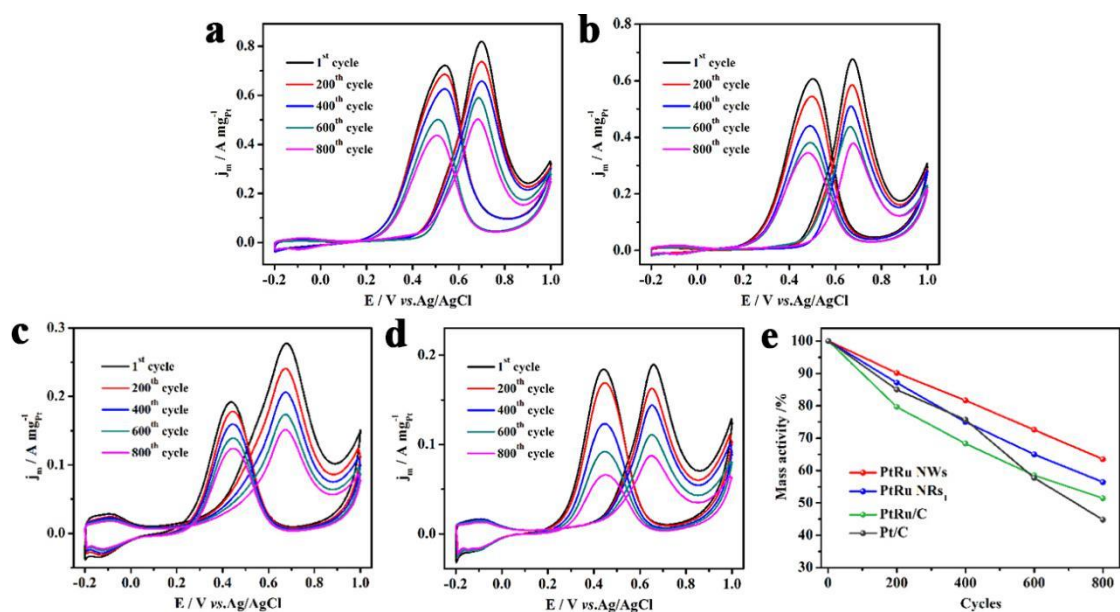

**Figure S18.** CVs of (a) PtRu NWs, (b) PtRu NRs<sub>1</sub> (c) commercial PtRu/C and (d) commercial Pt/C for MOR in 0.1 M HClO<sub>4</sub> + 0.5 M CH<sub>3</sub>OH solution. (e) Corresponding mass activities changes of these catalysts before and after 800 potential cycles.



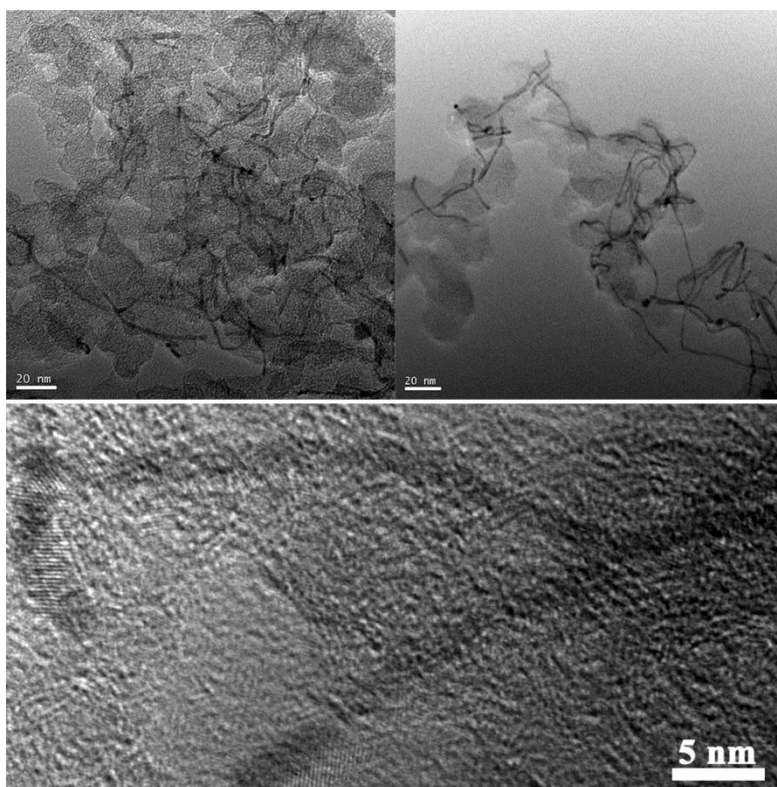

**Figure S19.** TEM images and HRTEM image of Vulcan XC-72 carbon supported PtRu NWs catalyst.

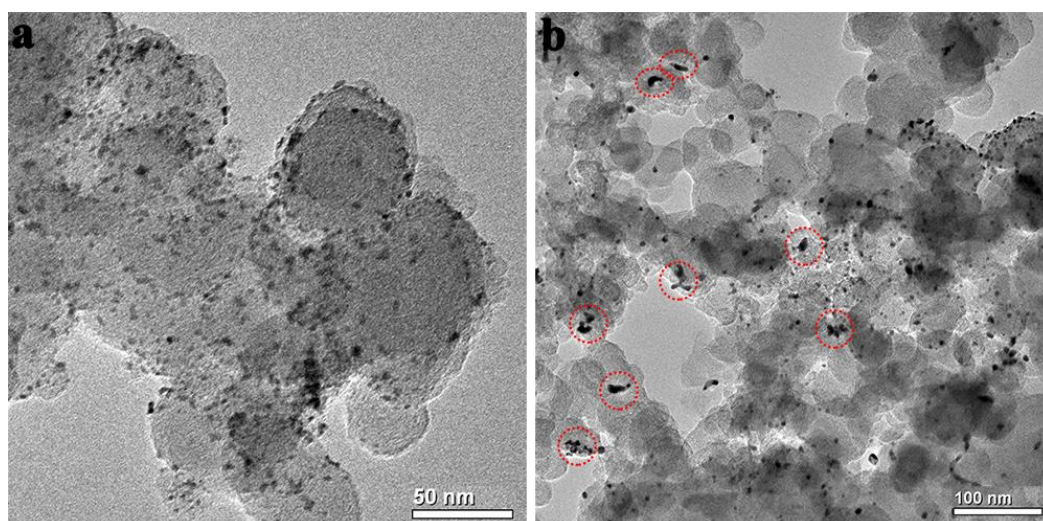

**Figure S20.** TEM images of commercial Pt/C catalyst before (a) and after (b) 800 potential cycles.
